# Supplementary material
Source: Springer Nature journal article supplement (https://www.springermedizin.de/resource/supplementary/12899_2010_173_MOESM6_ESM.pdf/9514636)

**A**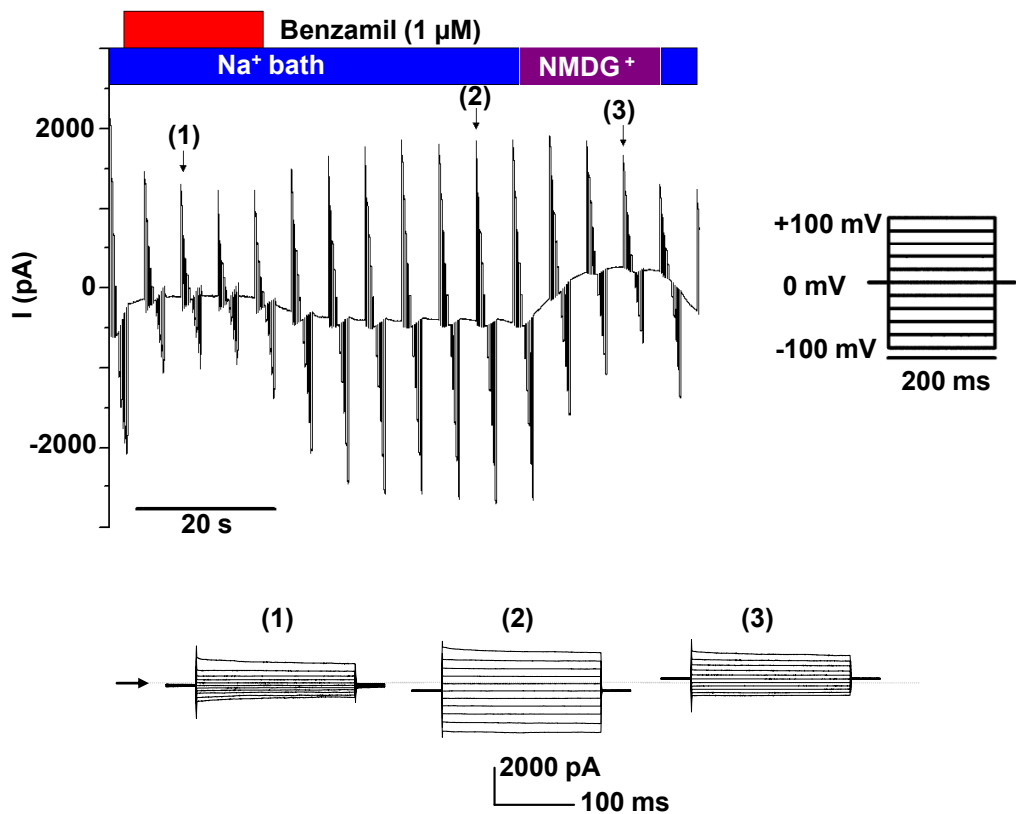**B**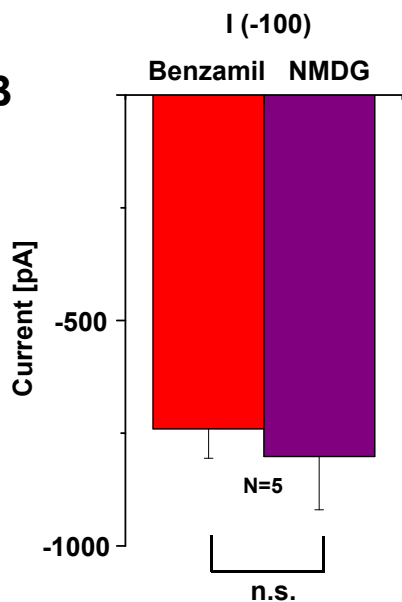**C**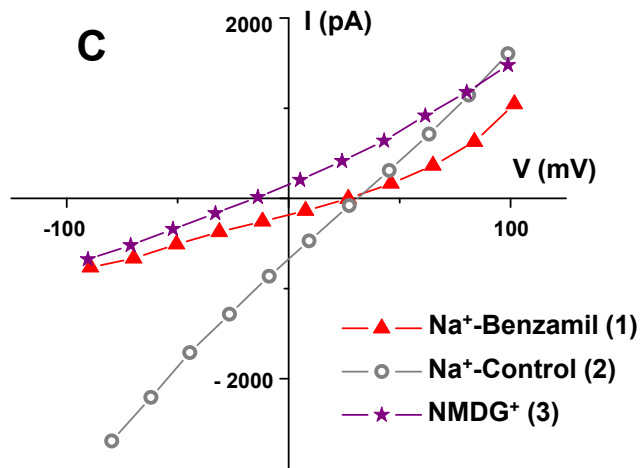

Supplement: MOESM6 [file 9514636]
